# Supplementary material for: Transcriptome profiling of wheat glumes in wild emmer, hulled landraces and modern cultivars
Source: PubMed Central journal article supplement (PMC4603339; doi:10.1186/s12864-015-1996-0), 2015-10-13

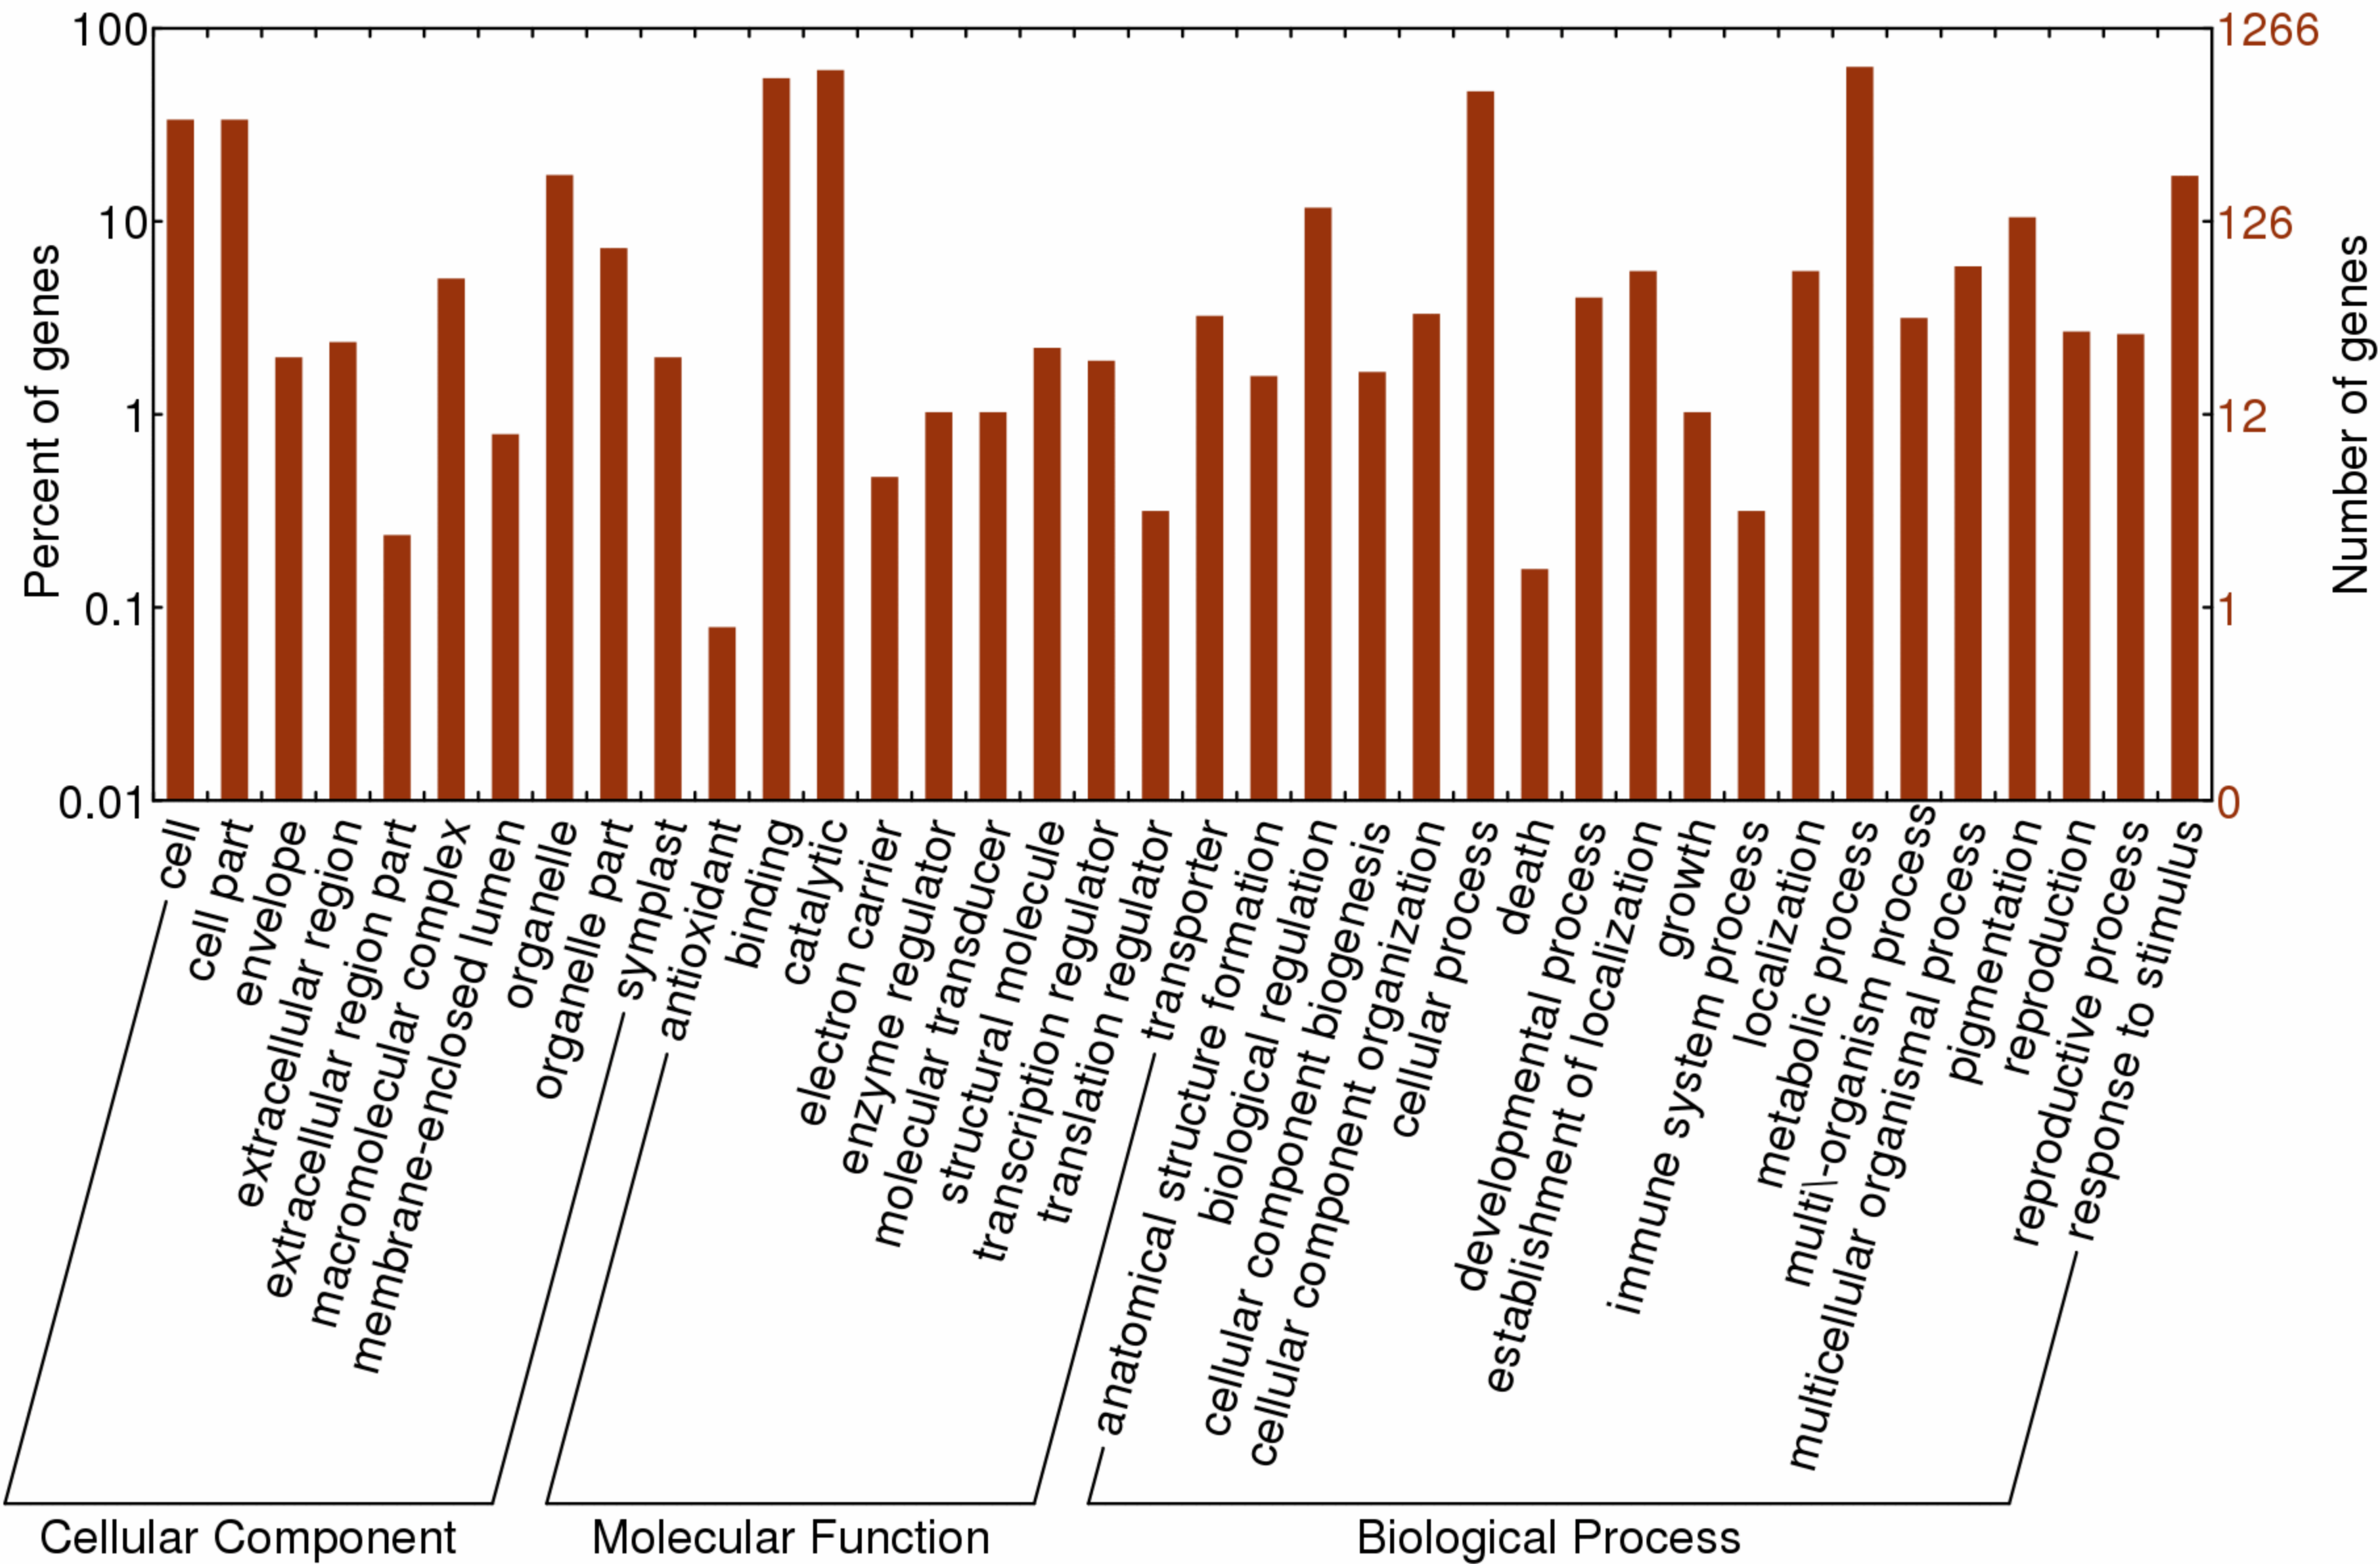

Supplement: 12864_2015_1996_MOESM5_ESM.pdf [file 12864_2015_1996_MOESM5_ESM.pdf]
